# Supplementary material for: The First Application of 1H NMR Spectroscopy for the Assessment of the Authenticity of Perfumes
Source: Preprints.org preprint supplement (doi:10.20944/preprints201908.0145.v1), 2019-08-12
Supplement: Supplementary file 1 [file supplementary]

**Supporting information**

**The first application of 1H NMR spectroscopy for the assessment of the authenticity of perfumes**

**Grzegorz Ciepielowski,a Barbara Pacholczyk-Sienicka,a* Łukasz Albrechta**

a*Institute of Organic Chemistry, Faculty of Chemistry, Lodz University of Technology, Zeromskiego 116, 90-924 Lodz, Poland*


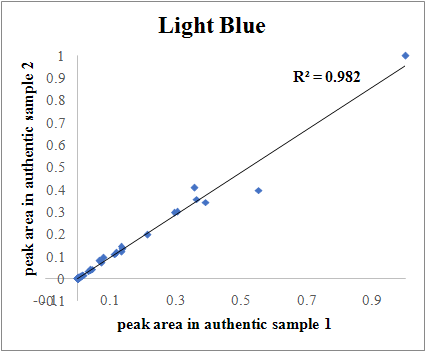


**Figure S1** The comparison of the peak area from 1H NMR spectra for two authentic samples *Light Blue*.


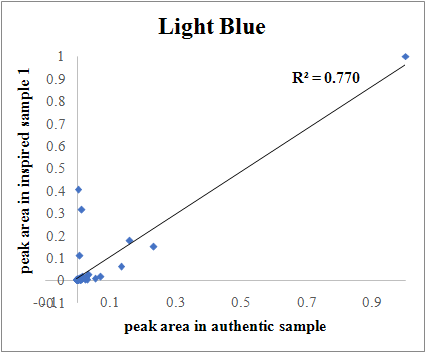


**Figure S2** The comparison of the peak area from 1H NMR spectra for the authentic *Light Blue* and inspired sample 1.


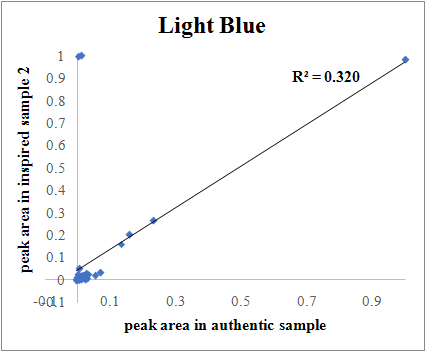


**Figure S3** The comparison of the peak area from 1H NMR spectra for the authentic *Light Blue* and inspired sample 2.


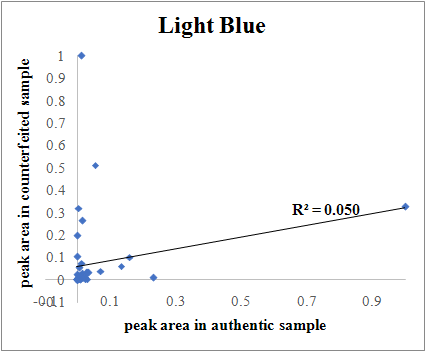


**Figure S4** The comparison of the peak area from 1H NMR spectra for the authentic *Light Blue* and counterfeit sample.


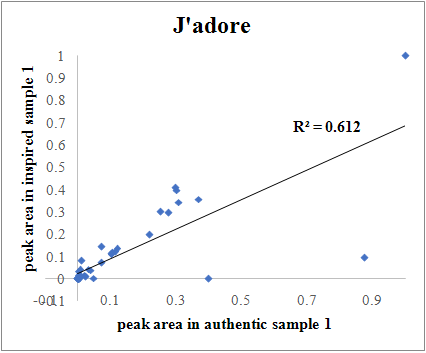


**Figure S5** The comparison of the peak area from 1H NMR spectra for the authentic *J’adore* and first inspired sample 1.


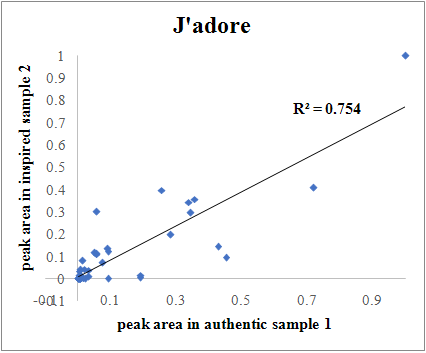


**Figure S6** The comparison of the peak area from 1H NMR spectra for the authentic *J’adore* and second inspired sample 2.


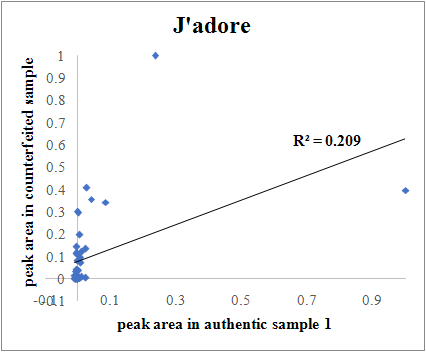


**Figure S7** The comparison of the peak area from 1H NMR spectra for the authentic *J’adore* and counterfeit sample.


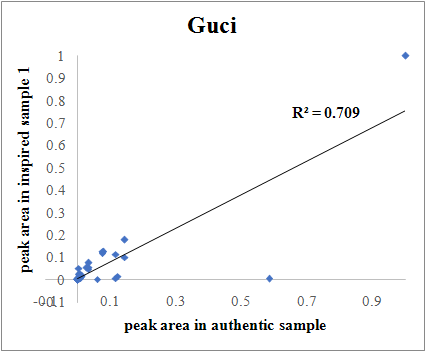


**Figure S8** The comparison of the peak area from 1H NMR spectra for the authentic *Guci* and first inspired sample.


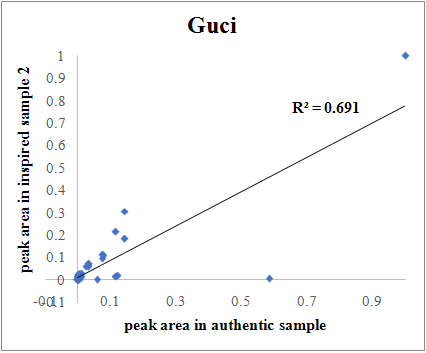


**Figure S9** The comparison of the peak area from 1H NMR spectra for the authentic *Guci* and second inspired sample.


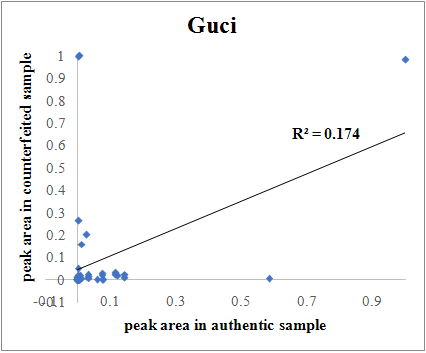


**Figure S10** The comparison of the peak area from 1H NMR spectra for the authentic *Guci* and counterfeit sample.


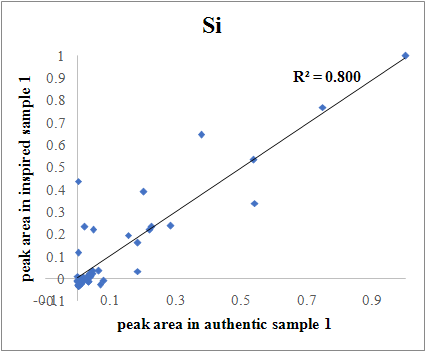


**Figure S11** The comparison of the peak area from 1H NMR spectra for the authentic *Si* and first inspired sample.


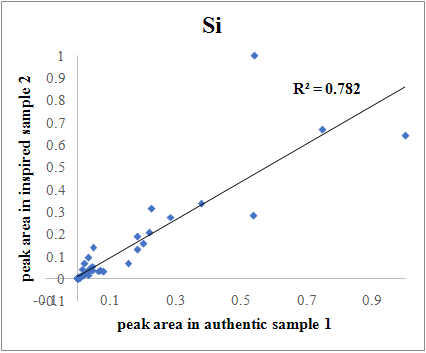


**Figure S12** The comparison of the peak area from 1H NMR spectra for the authentic *Si* and second inspired sample.


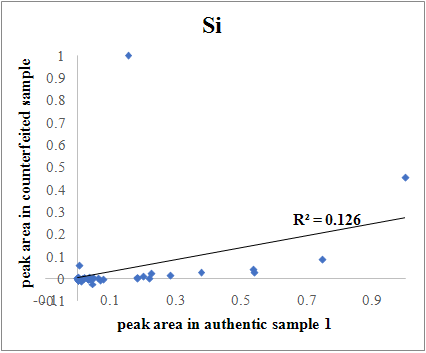


**Figure S13** The comparison of the peak area from 1H NMR spectra for the authentic *Si* and counterfeit sample.


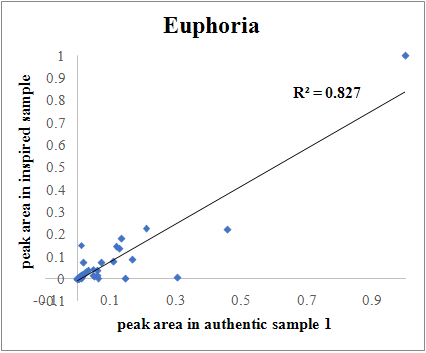


**Figure S14** The comparison of the peak area from 1H NMR spectra for the authentic *Euphoria* and inspired sample.


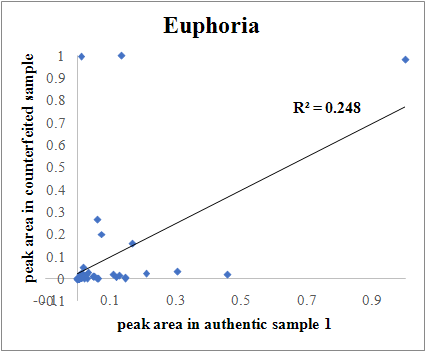


**Figure S15** The comparison of the peak area from 1H NMR spectra for the authentic *Euphoria* and counterfeit sample.


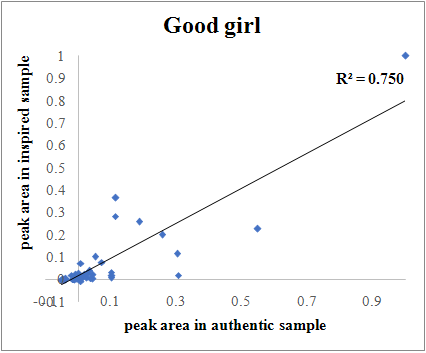


**Figure S16** The comparison of the peak area from 1H NMR spectra for the authentic *Good Girl* and inspired sample.


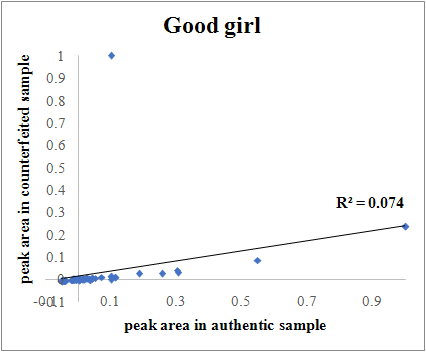


**Figure S17** The comparison of the peak area from 1H NMR spectra for the authentic *Good Girl* and counterfeit sample.
